# Supplementary material for: Distribution and molecular characterization of ESBL, pAmpC β-lactamases, and non-β-lactam encoding genes in Enterobacteriaceae isolated from hospital wastewater in Eastern Cape Province, South Africa
Source: PubMed Central journal article supplement (PMC8294522; doi:10.1371/journal.pone.0254753), 2021-07-21
Supplement: pone.0254753.s001.pdf [file pone.0254753.s001.pdf]

**S1 Table. Primers used for screening extended-spectrum  $\beta$ -lactamase, plasmid AmpC determinants [48] as well as non- $\beta$ -lactam resistance determinants [49] in Multidrug-resistant Enterobacteriaceae recovered from hospital wastewater.**

| Target genes                        | Primer sequences (5'–3')                                | Thermocycling conditions                                                 | Expected amplicon size (bp) |
|-------------------------------------|---------------------------------------------------------|--------------------------------------------------------------------------|-----------------------------|
| <i>bla</i> <sub>TEM</sub>           | F: CATTTCGGTGTGCGCCCTTATTC<br>R: CGTTCATCCATAGTTGCCTGAC | 94 °C for 10 mins<br>30 cycles of                                        | 800                         |
| <i>bla</i> <sub>SHV</sub>           | F: AGCCGCTTGAGCAAATTA AAC<br>R: ATCCCGCAGATAAATCACCAC   | 94 °C for 40s<br>58 °C for 40s                                           | 713                         |
| <i>bla</i> <sub>OXA-1-like</sub>    | F: GGCACCAGATTCAACTTTCAAG<br>R: GACCCCAAGTTTCTGTAAAGTG  | 72 °C for 1 min<br>72 °C for 7 mins                                      | 564                         |
| <i>bla</i> <sub>CTX-M Group 1</sub> | F: TTAGGAARTGTGCCGCTGYA<br>R: CGATATCGTTGGTGGTRCCAT     | 94 °C for 10 mins<br>30 cycles of                                        | 688                         |
| <i>bla</i> <sub>CTX-M Group 2</sub> | F: CGTTAACGGCACGATGAC<br>R: CGATATCGTTGGTGGTRCCAT       | 94 °C for 40s<br>60 °C for 40s                                           | 404                         |
| <i>bla</i> <sub>CTX-M Group 9</sub> | F: TCAAGCTGCCGATCTGGT<br>R: TGATTCTCGCCGCTGAAG          | 72 °C for 1 min<br>72 °C for 7 mins                                      | 561                         |
| <i>bla</i> <sub>PER</sub>           | F: GCTCCGATAATGAAAGCGT<br>R: TTCGGCTTGACTCGGCTGA        |                                                                          | 520                         |
| <i>bla</i> <sub>VEB</sub>           | F: CATTTCGGATGCAAAGCGT<br>R: CGAAGTTTCTTTGGACTCTG       |                                                                          | 648                         |
| <i>bla</i> <sub>FOX</sub>           | F: CTACAGTGCGGGTGGTTT<br>R: CTATTTGCGGCCAGGTGA          | 94 °C for 10 mins<br>30 cycles of                                        | 162                         |
| <i>bla</i> <sub>DHA</sub>           | F: TGATGGCACAGCAGGATATTC<br>R: GCTTTGACTCTTTCGGTATTTCG  | 94 °C for 40s<br>59 °C for 40s                                           | 997                         |
| <i>bla</i> <sub>ClT</sub>           | F: CGAAGAGGCAATGACCAGAC<br>R: ACGGACAGGGTTAGGATAGY      | 72 °C for 1 min<br>72 °C for 7 mins                                      | 538                         |
| <i>bla</i> <sub>EBC</sub>           | F: CGGTAAAGCCGATGTTGCG<br>R: AGCCTAACCCCTGATACA         |                                                                          | 683                         |
| <i>bla</i> <sub>IMP</sub>           | F: TTGACTCCATTTACDG<br>R: GATYGAGAATTAAGCCACYCT         | 94 °C for 10 mins<br>30X (94 °C for 40s; 55 °C for 40s; 72 °C for 1 min) | 139                         |

|                                  |                                                   |                                                                                              |     |
|----------------------------------|---------------------------------------------------|----------------------------------------------------------------------------------------------|-----|
| <i>bla<sub>VIM</sub></i>         | F: GATGGTGTGGTTCGCATA<br>R: CGAATGCGCAGCACCG      | 72 °C for 7 mins                                                                             | 390 |
| <i>bla<sub>OXA-48-like</sub></i> | F: GCTTGATCGCCCTCGATT<br>R: GATTTGCTCCGTGGCCGAAA  | 94 °C for 10 mins<br>30X (94 °C for 40s; 57 °C for 40s; 72 °C for 1 min)<br>72 °C for 7 mins | 281 |
| <i>aadA</i>                      | F:GTGGATGGCGGCCTGAAGCC<br>R:AATGCCAGTCGGCAGCG     | 94 °C for 4 mins<br>30X (94 °C for 45s; 50 °C for 45s; 72 °C for 45s)<br>72 °C for 7 mins    | 525 |
| <i>tetA</i>                      | F:GCTACATCCTGCTTGCCTTC<br>R:CATAGATCGCCGTGAAGAGG  | 94 °C for 5 mins<br>35 cycles of                                                             | 201 |
| <i>tetB</i>                      | F: TTGGTTAGGGGCAAGTTTTG<br>R:GTAATGGGCAATAACACCG  | 94 °C for 1 min<br>55 °C for 1 min                                                           | 359 |
| <i>tetC</i>                      | F:CTTGAGAGCCTTCAACCCAG<br>R:ATGGTCGTCATCTACCTGCC  | 72 °C for 1.5 mins<br>72 °C for 5 mins                                                       | 418 |
| <i>tetD</i>                      | F:AAACCATTACGGCATTCTGC<br>R:GACCGGATACACCATCCATC  |                                                                                              | 300 |
| <i>sul I</i>                     | F:TTCGGCATTCTGAATCTCAC<br>R:ATGATCTAACCCCTCGGTCTC |                                                                                              | 822 |
| <i>sul II</i>                    | F:CGGCATCGTCAACATAACC<br>R:GTGTGCGGATGAAGTCAG     | 94 °C for 5 mins<br>30 cycles of                                                             | 625 |
| <i>catII</i>                     | F:ACACTTTGCCCTTTATCGTC<br>R:TGAAAGCCATCACATACTGC  | 94 °C for 30s; 50 °C for 30s; 72 °C for 1.5 mins<br>72 °C for 5 mins                         | 543 |

<sup>a</sup>Annealing position within the corresponding open reading frame (from the base A of start codon ATG).

<sup>b</sup>Y=T or C; R=A or G; S=G or C; D=A or G or T
