# Supplementary material for: Distribution and molecular characterization of ESBL, pAmpC β-lactamases, and non-β-lactam encoding genes in Enterobacteriaceae isolated from hospital wastewater in Eastern Cape Province, South Africa
Source: PubMed Central journal article supplement (PMC8294522; doi:10.1371/journal.pone.0254753), 2021-07-21
Supplement: pone.0254753.s002.pdf [file pone.0254753.s002.pdf]

**S2 Table. MALDI-TOF identification of presumptive isolates obtained from hospital wastewater.**

| <b>Family</b>      | <b>Genus</b>                | <b>Species</b>         | <b>Number identified</b> |
|--------------------|-----------------------------|------------------------|--------------------------|
| Moraxellaceae      | <i>Acinetobacter</i>        | <i>johnsonii</i>       | <b>4</b>                 |
| Enterobacteriaceae | <i>Citrobacter</i>          | <i>freundii</i>        | 3                        |
|                    | <i>Enterobacter</i>         | <i>amnigenus</i>       | 1                        |
|                    | <i>Enterobacter</i>         | <i>asburiae</i>        | 2                        |
|                    | <i>Enterobacter</i>         | <i>hormaechei</i>      | 1                        |
|                    | <i>Enterobacter</i>         | <i>kobei</i>           | 1                        |
|                    | <i>Escherichia</i>          | <i>coli</i>            | 3                        |
|                    | <i>Klebsiella</i>           | <i>oxytoca</i>         | 11                       |
|                    | <i>Klebsiella</i>           | <i>pneumoniae</i>      | 9                        |
|                    | <i>Serratia</i>             | <i>marcescens</i>      | 3                        |
|                    | <i>Raoultella</i>           | <i>ornithinolytica</i> | 1                        |
|                    |                             |                        | <b>35</b>                |
|                    | Not reliable identification |                        | <b>5</b>                 |
| <b>GRAND TOTAL</b> |                             |                        | <b>44</b>                |
